# Supplementary material for: Nitrite Generating and Depleting Capacity of the Oral Microbiome and Cardiometabolic Risk: Results from ORIGINS
Source: PubMed Central journal article supplement — J Am Heart Assoc. 2022 May 16;11(10):e023038. doi: 10.1161/JAHA.121.023038 (PMC9238569; doi:10.1161/jaha.121.023038), 2022-05-16
Supplement: JAH3-11-e023038-s001.pdf [file JAH3-11-e023038-s001.pdf]

## **SUPPLEMENTAL MATERIAL**

## **Data S1. Supplemental Methods**

### *Bacterial DNA extraction and 16S rRNA sequencing*

50 ng of DNA was used in polymerase chain reaction (PCR) amplification targeting the V3-V4 region of the 16S rRNA gene (using 341F/806R universal primers), and PCR products were purified using AMPure beads<sup>22,23</sup>. 100 ng of each library were pooled, gel-purified, and quantified using a bioanalyzer. 12 pM of the library mixture was spiked with 20% PhiX and run on a MiSeq (Illumina) platform. Raw reads were analyzed with QIIME2<sup>24</sup>.

### *Data curation pipeline of the raw 16S rRNA sequences using QIIME2*

Demultiplexed sequences were quality filtered with default parameters in qiime quality-filter q-score, namely, reads were trimmed after the first appearance of 3 basecalls with a PHRED score of 4 or less, and the entire read was removed if the read was truncated to less than 75% of the input sequence. Quality filtered forward-read sequences were denoised using Deblur with the default parameters<sup>48</sup>. Samples with less than 1,000 quality filtered reads were removed from downstream analysis. In order to remove reads aligned to chloroplast or mitochondrial genes, sequences were aligned using a classifier pretrained on the GreenGenes v13\_8 database with 99% sequence homology using sklearn<sup>49</sup>. Sequences aligned to mitochondria or chloroplast were removed using filter-table --p-exclude (0.005% of the entire dataset). Overall, 44,776,283 sequences were generated for final analysis (median of 37,067 sequences per sample).

## Data S2. Supplemental Results

*Correlation of nitrate-reducing taxa summary score NO<sub>3</sub>TSS and a priori individual taxa relative abundances with predicted gene abundance summary scores and ratios*

A previous investigation using ORIGINS Wave 1 baseline data (n=281) found higher nitrate-reducing taxa summary score (NO<sub>3</sub>TSS) associated with lower insulin resistance and plasma glucose in the full cohort, and lower systolic blood pressure in normotensive participants<sup>13</sup>.

We replicated the operationalization of NO<sub>3</sub>TSS and examined its correlation with the inferred gene abundance summary scores and ratios created in this study.

16S rRNA gene sequencing was performed per the HOMINGS (Human Oral Microbiome Identification using Next Generation Sequencing) methodology specifically designed for oral taxa to generate species-level information<sup>22,23</sup>. A customized BLAST program for taxonomic classification (ProbeSeq for HOMINGS), based on running the 16S rRNA sequence reads from Illumina sequencing against in-silico species-specific 16S rRNA-based oligonucleotide probes<sup>23,50</sup>, was used to generate a final table of relative abundances of taxa species in that sample. The NO<sub>3</sub>TSS was created by summing the standardized arcsine square root transformed relative abundance of taxa identified *a priori* to be associated with nitrate-reducing capacity<sup>16,46</sup>.

NO<sub>3</sub>TSS is optimized to include only taxa previously identified to be most associated with oral nitrate-reducing capacity whether directly or indirectly (as “helper” species) contributing to oral nitrate-reduction<sup>16,46</sup>, and the small subset of a taxa is selected *a priori* and independently from the PICRUSt2 analyses. However, as gene abundances are inferred from the 16S rRNA gene sequences, some correlation with the taxa summary score NO<sub>3</sub>TSS can be expected. The nitrate-reducing taxa summary score NO<sub>3</sub>TSS was most strongly associated

with the NO<sub>2</sub> product summary score ( $r=0.54$ ,  $p<0.0001$ ) and RD pathway summary score, and least associated with the DNRA pathway and NH<sub>3</sub> product summary score (Figure S3A). All nitrite generation-to-depletion ratios were moderately positively associated ( $r=0.41$  to  $0.44$ ,  $p\text{-value}=0.0001$ ) with the NO<sub>3</sub>TSS (Figure S3B).

Among the individual *a priori* taxa that comprise the NO<sub>3</sub>TSS, *Rothia denticariosa* and *Corynebacterium durum* showed the strongest associations with the NO<sub>2</sub> and NO gene abundance summary score (Figure S3A). *Actinomyces odontolyticus* did not have any associations with the individual gene abundance, summary scores or ratios. The nitrite generation-to depletion ratios were most strongly positively correlated to *A. naeslundii*, *C. durum*, *C. matruchotti*, and *R. dentocariosa* (Figure S3B). Only *Prevotella melaninogenica* was consistently inversely associated with the gene abundance ratios (Figure S3B). *Neisseria sicca* was not present in this dataset and not included in the taxa summary score.

In exploratory correlations of the taxa with individual gene abundances (Figure S3C), *Rothia dentocariosa* and *Corynebacterium durum* were the taxa most strongly associated with the *nar* and *nir* genes, and the *narK* nitrate/nitrite transporter gene. *Hemophilus parainfluenzae* had the strongest correlation with the *nap* nitrate reductase genes.

**Table S1. Mean relative gene abundances (%) of the predicted 16 KEGG Orthologs (KO) corresponding to bacterial enzymes of interest in the NO<sub>3</sub>-NO<sub>2</sub>-NO pathway, in subgingival plaque samples among 764 participants in ORIGINS (Oral Infections, Glucose Intolerance, and Insulin Resistance Study).**

| Pathway                                           | Product         | Bacterial Gene          | KO Identifier       | Mean Relative Gene Abundance (%)* | Mean (SD) Absolute Gene Abundance* |
|---------------------------------------------------|-----------------|-------------------------|---------------------|-----------------------------------|------------------------------------|
| Respiratory Denitrification (RD)                  | NO <sub>2</sub> | <i>nar</i>              |                     | 0.083970                          |                                    |
|                                                   |                 | <i>narB</i>             | K00367 <sup>†</sup> | 0.000122                          | 32 (185)                           |
|                                                   |                 | <i>narG, narZ, nxrA</i> | K00370              | 0.027546                          | 10457 (8389)                       |
|                                                   |                 | <i>narH, narY, nxrB</i> | K00371              | 0.028143                          | 10694 (8529)                       |
|                                                   |                 | <i>narI, narV</i>       | K00374              | 0.028159                          | 10700 (8526)                       |
|                                                   | NO              | <i>nir</i>              |                     | 0.033071                          |                                    |
|                                                   |                 | <i>nirK</i>             | K00368              | 0.033067                          | 12569 (9821)                       |
| <i>nirS</i>                                       |                 | K15864 <sup>†</sup>     | 0.000004            | 1 (11)                            |                                    |
| Dissimilatory Nitrate Reduction to Ammonia (DNRA) | NO <sub>2</sub> | <i>nap</i>              |                     | 0.012145                          |                                    |
|                                                   |                 | <i>napA</i>             | K02567              | 0.006082                          | 2256 (2285)                        |
|                                                   |                 | <i>napB</i>             | K02568              | 0.006063                          | 2250 (2286)                        |
|                                                   | NH <sub>3</sub> | <i>nrf</i>              |                     | 0.030303                          |                                    |
|                                                   |                 | <i>nrfA</i>             | K03385              | 0.016998                          | 6246 (4481)                        |
|                                                   |                 | <i>nrtH</i>             | K15876              | 0.013305                          | 4864 (3892)                        |
| Assimilatory Nitrate Reduction (ANR)              | NO <sub>2</sub> | <i>nas</i>              |                     | 0.001398                          |                                    |
|                                                   |                 | <i>nasA</i>             | K00372 <sup>†</sup> | 0.000993                          | 358 (652)                          |
|                                                   |                 | <i>nasB</i>             | K00360 <sup>†</sup> | 0.000405                          | 150 (449)                          |
|                                                   | NH <sub>3</sub> | <i>nir</i>              |                     | 0.031157                          |                                    |
|                                                   |                 | <i>nirA</i>             | K00366              | 0.011898                          | 4243 (3286)                        |
|                                                   |                 | <i>nirB</i>             | K00362              | 0.009682                          | 3905 (5514)                        |
|                                                   |                 | <i>nirD</i>             | K00363              | 0.009577                          | 3872 (5502)                        |
| NO <sub>3</sub> and NO <sub>2</sub> Transport     | -               | <i>nark</i>             | K02575              | 0.032667                          | 12350 (9263)                       |

\* Relative gene abundance refers to the proportion of individual KEGG Orthologs (KO) counts over the total number of functional gene counts in the sample. Absolute count data should not be directly interpreted as we do not have information about total microbial load and biospecimen collection volume was not standardized. Counts are presented only to illustrate the distributions of the different KOs.

<sup>†</sup> KOs not detected in all participants; Prevalence of K15864 = 714 (93.5%), K00367 = 477 (62.4%), K00360 = 158 (20.7%), K00372 = 18 (2.4%). K17877 and K10534 were not present in the dataset.

Abbreviations: **NO<sub>3</sub>**, nitrate; **NO<sub>2</sub>**, nitrite; **NO**, nitric oxide; **NH<sub>3</sub>**, ammonia; **RD**, respiratory denitrification; **DNRA**, dissimilatory nitrate reduction to ammonia; **ANR**, assimilatory nitrate reduction; KEGG, Kyoto Encyclopedia of Genes and Genomes; KO: Kyoto Encyclopaedia of Genes and Genomes Orthologs

**Table S2. Associations between potential confounders and quartiles of predicted gene abundances: A) NH<sub>3</sub> product summary score, B) NO vs. NH<sub>3</sub> nitrite generation-to-depletion ratio, and C) quartiles of composite cardiometabolic Z-score (CMZ)**

Abbreviations: **NO**, nitric oxide; **NH<sub>3</sub>**, ammonia; **BMI**, body mass index; **CMZ**: composite cardiometabolic score which averages the Z-scores for the individual cardiometabolic risk variables

**A) NH<sub>3</sub> product summary score**

| <b>Characteristic</b>         | <b>Q1<br/>NH<sub>3</sub></b> | <b>Q2<br/>NH<sub>3</sub></b> | <b>Q3<br/>NH<sub>3</sub></b> | <b>Q4<br/>NH<sub>3</sub></b> | <b>p-value</b> |
|-------------------------------|------------------------------|------------------------------|------------------------------|------------------------------|----------------|
| <b>Age (years)</b>            | 33.13 (10.02)                | 31.58 (9.38)                 | 31.02 (9.27)                 | 30.93 (8.64)                 | 0.0181         |
| <b>Sex</b>                    |                              |                              |                              |                              | 0.5948         |
| Female                        | 128 (67.02%)                 | 136 (71.2%)                  | 138 (72.25%)                 | 139 (72.77%)                 |                |
| Male                          | 63 (32.98%)                  | 55 (28.8%)                   | 53 (27.75%)                  | 52 (27.23%)                  |                |
| <b>Race/ethnicity</b>         |                              |                              |                              |                              | 0.0042         |
| Hispanic                      | 57 (29.84%)                  | 50 (26.32%)                  | 52 (27.66%)                  | 53 (28.04%)                  |                |
| Non-Hispanic White            | 43 (22.51%)                  | 58 (30.53%)                  | 48 (25.53%)                  | 68 (35.98%)                  |                |
| Black                         | 19 (9.95%)                   | 28 (14.74%)                  | 31 (16.49%)                  | 33 (17.46%)                  |                |
| Other                         | 72 (37.7%)                   | 54 (28.42%)                  | 57 (30.32%)                  | 35 (18.52%)                  |                |
| <b>Education</b>              |                              |                              |                              |                              | 0.581          |
| < Bachelor's Degree           | 49 (26.63%)                  | 43 (22.87%)                  | 44 (23.66%)                  | 35 (19.23%)                  |                |
| Bachelor's Degree             | 80 (43.48%)                  | 94 (50%)                     | 94 (50.54%)                  | 97 (53.3%)                   |                |
| > Bachelor's Degree           | 55 (29.89%)                  | 51 (27.13%)                  | 48 (25.81%)                  | 50 (27.47%)                  |                |
| <b>Smoking Status</b>         |                              |                              |                              |                              | 0.7928         |
| Never                         | 151 (84.83%)                 | 160 (87.43%)                 | 164 (90.11%)                 | 155 (86.59%)                 |                |
| Former                        | 12 (6.74%)                   | 11 (6.01%)                   | 10 (5.49%)                   | 10 (5.59%)                   |                |
| Current                       | 15 (8.43%)                   | 12 (6.56%)                   | 8 (4.4%)                     | 14 (7.82%)                   |                |
| <b>BMI (kg/m<sup>2</sup>)</b> | 26.02 (5.73)                 | 25.1 (5.45)                  | 25.26 (5.92)                 | 25.71 (6.1)                  | 0.6844         |
| <b>Periodontal Disease</b>    |                              |                              |                              |                              | 0.0902         |
| None/Mild                     | 123 (64.74%)                 | 142 (75.13%)                 | 142 (74.74%)                 | 133 (70.74%)                 |                |
| Moderate/Severe               | 67 (35.26%)                  | 47 (24.87%)                  | 48 (25.26%)                  | 55 (29.26%)                  |                |

Values presented in mean (SD) or n (%). *P* values are for ANOVA *F* statistics or  $\chi^2$  tests for differences in level of covariates between participants across increasing quartiles of predicted gene abundance NH<sub>3</sub> product summary score.

**B) NO vs. NH<sub>3</sub> nitrite generation-to-depletion ratio**

| <b>Characteristic</b>         | <b>Q1<br/>NO vs. NH<sub>3</sub></b> | <b>Q2<br/>NO vs. NH<sub>3</sub></b> | <b>Q3<br/>NO vs. NH<sub>3</sub></b> | <b>Q4<br/>NO vs. NH<sub>3</sub></b> | <b>p-value</b> |
|-------------------------------|-------------------------------------|-------------------------------------|-------------------------------------|-------------------------------------|----------------|
| <b>Age (years)</b>            | 33.22 (9.96)                        | 30.05 (8.47)                        | 31.73 (9.58)                        | 31.65 (9.2)                         | 0.3163         |
| <b>Sex</b>                    |                                     |                                     |                                     |                                     | 0.6968         |
| Female                        | 541 (70.81%)                        | 136 (71.2%)                         | 141 (73.82%)                        | 133 (69.63%)                        |                |
| Male                          | 223 (29.19%)                        | 55 (28.8%)                          | 50 (26.18%)                         | 58 (30.37%)                         |                |
| <b>Race/ethnicity</b>         |                                     |                                     |                                     |                                     | 0.0855         |
| Hispanic                      | 212 (27.97%)                        | 64 (33.51%)                         | 46 (24.47%)                         | 48 (25.53%)                         |                |
| Non-Hispanic White            | 217 (28.63%)                        | 45 (23.56%)                         | 59 (31.38%)                         | 58 (30.85%)                         |                |
| Black                         | 111 (14.64%)                        | 34 (17.8%)                          | 24 (12.77%)                         | 34 (18.09%)                         |                |
| Other                         | 218 (28.76%)                        | 48 (25.13%)                         | 59 (31.38%)                         | 48 (25.53%)                         |                |
| <b>Education</b>              |                                     |                                     |                                     |                                     | 0.0553         |
| < Bachelor's Degree           | 171 (23.11%)                        | 53 (28.96%)                         | 32 (17.58%)                         | 48 (25.67%)                         |                |
| Bachelor's Degree             | 365 (49.32%)                        | 84 (45.9%)                          | 98 (53.85%)                         | 96 (51.34%)                         |                |
| > Bachelor's Degree           | 204 (27.57%)                        | 46 (25.14%)                         | 52 (28.57%)                         | 43 (22.99%)                         |                |
| <b>Smoking Status</b>         |                                     |                                     |                                     |                                     | 0.801          |
| Never                         | 630 (87.26%)                        | 153 (85.96%)                        | 157 (87.71%)                        | 161 (88.46%)                        |                |
| Former                        | 43 (5.96%)                          | 10 (5.62%)                          | 11 (6.15%)                          | 8 (4.4%)                            |                |
| Current                       | 49 (6.79%)                          | 15 (8.43%)                          | 11 (6.15%)                          | 13 (7.14%)                          |                |
| <b>BMI (kg/m<sup>2</sup>)</b> | 25.52 (5.81)                        | 26.4 (6.62)                         | 25.22 (5.86)                        | 25.63 (5.56)                        | 0.0247         |
| <b>Periodontal Disease</b>    | 55 (28.8%)                          | 50 (26.18%)                         | 58 (30.37%)                         | 60 (31.41%)                         | 0.1732         |
| None/Mild                     | 540 (71.33%)                        | 123 (65.08%)                        | 140 (74.07%)                        | 141 (73.82%)                        |                |
| Moderate/Severe               | 217 (28.67%)                        | 66 (34.92%)                         | 49 (25.93%)                         | 50 (26.18%)                         |                |

Values presented in mean (SD) or n (%). *P* values are for ANOVA *F* statistics or  $\chi^2$  tests for differences in level of covariates between participants across increasing quartiles of predicted gene abundance NO vs. NH<sub>3</sub> nitrite generation-to-depletion ratio.



### C) Composite Cardiometabolic Z-score (CMZ)

| Mean SD or %                  | Q1<br>CMZ    | Q2<br>CMZ    | Q3<br>CMZ    | Q4<br>CMZ     | p-value |
|-------------------------------|--------------|--------------|--------------|---------------|---------|
| <b>Age (years)</b>            | 29.27 (7.95) | 29.34 (7.98) | 31.31 (9.01) | 36.74 (10.34) | <.0001  |
| <b>Sex</b>                    |              |              |              |               | <.0001  |
| Female                        | 541 (70.81%) | 158 (82.72%) | 147 (76.96%) | 126 (65.97%)  |         |
| Male                          | 223 (29.19%) | 33 (17.28%)  | 44 (23.04%)  | 65 (34.03%)   |         |
| <b>Race/ethnicity</b>         |              |              |              |               | <.0001  |
| Hispanic                      | 212 (27.97%) | 35 (18.42%)  | 54 (28.72%)  | 56 (29.63%)   |         |
| Non-Hispanic White            | 217 (28.63%) | 81 (42.63%)  | 65 (34.57%)  | 46 (24.34%)   |         |
| Black                         | 111 (14.64%) | 15 (7.89%)   | 15 (7.98%)   | 29 (15.34%)   |         |
| Other                         | 218 (28.76%) | 59 (31.05%)  | 54 (28.72%)  | 58 (30.69%)   |         |
| <b>Education</b>              |              |              |              |               | <.0001  |
| < Bachelor's Degree           | 171 (23.11%) | 22 (11.76%)  | 30 (16.3%)   | 45 (24.19%)   |         |
| Bachelor's Degree             | 365 (49.32%) | 100 (53.48%) | 104 (56.52%) | 96 (51.61%)   |         |
| > Bachelor's Degree           | 204 (27.57%) | 65 (34.76%)  | 50 (27.17%)  | 45 (24.19%)   |         |
| <b>Smoking Status</b>         |              |              |              |               | 0.3257  |
| Never                         | 630 (87.26%) | 155 (85.64%) | 160 (88.89%) | 164 (90.61%)  |         |
| Former                        | 43 (5.96%)   | 15 (8.29%)   | 8 (4.44%)    | 6 (3.31%)     |         |
| Current                       | 49 (6.79%)   | 11 (6.08%)   | 12 (6.67%)   | 11 (6.08%)    |         |
| <b>BMI (kg/m<sup>2</sup>)</b> | 25.52 (5.81) | 21.91 (3.16) | 23.89 (4.06) | 25.76 (4.98)  | <.0001  |
| <b>Periodontal Disease</b>    |              |              |              |               | <.0001  |
| None/Mild                     | 540 (71.33%) | 150 (78.95%) | 144 (75.39%) | 137 (73.26%)  |         |
| Moderate/Severe               | 217 (28.67%) | 40 (21.05%)  | 47 (24.61%)  | 50 (26.74%)   |         |

Values presented in mean (SD) or n (%). *P* values are for ANOVA *F* statistics or  $\chi^2$  tests for differences in level of covariates between participants across increasing quartiles of composite cardiometabolic Z-score (CMZ).

**Table S3. Results from Figure 2 – Association of predicted gene abundance pathway and product summary scores and ratios of nitrite/NO-generation-to-depletion with cardiometabolic risk Z-scores, in unadjusted (N=764), simple adjusted models (N=758) and fully adjusted models (N=705)**

| Metagenomic Score                           | Cardiometabolic risk variable (Z-score) | Unadjusted (N=764) |         |             | Adjusted (Simple) (N=758) |         |             | Adjusted (Full) (N=705) |         |             |
|---------------------------------------------|-----------------------------------------|--------------------|---------|-------------|---------------------------|---------|-------------|-------------------------|---------|-------------|
|                                             |                                         | Reg Coef           | p-value | FDR q-value | Reg Coef                  | p-value | FDR q-value | Reg Coef                | p-value | FDR q-value |
| <b>Gene abundance pathway summary score</b> |                                         |                    |         |             |                           |         |             |                         |         |             |
| <b>RD</b>                                   | Composite                               | -0.07              | 0.0059  | 0.0221      | -0.04                     | 0.1000  | 0.1607      | 0.00                    | 0.9943  | 0.9943      |
|                                             | Insulin                                 | -0.10              | 0.0077  | 0.0252      | -0.08                     | 0.0326  | 0.0912      | -0.03                   | 0.4548  | 0.6964      |
|                                             | HOMA-iR                                 | -0.09              | 0.0100  | 0.0307      | -0.07                     | 0.0534  | 0.1138      | -0.02                   | 0.6462  | 0.8051      |
|                                             | HbA1C                                   | -0.07              | 0.0393  | 0.0767      | -0.01                     | 0.7648  | 0.8059      | 0.00                    | 0.9205  | 0.9596      |
|                                             | FPG                                     | -0.02              | 0.4999  | 0.5832      | 0.01                      | 0.6698  | 0.7375      | 0.05                    | 0.1239  | 0.3036      |
|                                             | DBP                                     | -0.04              | 0.2880  | 0.3814      | -0.01                     | 0.8445  | 0.8682      | 0.02                    | 0.5111  | 0.7366      |
|                                             | SBP                                     | -0.08              | 0.0277  | 0.0591      | -0.07                     | 0.0396  | 0.0994      | -0.03                   | 0.3456  | 0.6048      |
| <b>ANR</b>                                  | Composite                               | 0.01               | 0.8360  | 0.8716      | 0.02                      | 0.3014  | 0.3938      | 0.03                    | 0.1165  | 0.3036      |
|                                             | Insulin                                 | -0.03              | 0.4188  | 0.5195      | -0.02                     | 0.6280  | 0.7156      | -0.01                   | 0.7516  | 0.8621      |
|                                             | HOMA-iR                                 | -0.02              | 0.5215  | 0.5942      | -0.01                     | 0.8092  | 0.8437      | 0.00                    | 0.9680  | 0.9882      |
|                                             | HbA1C                                   | -0.02              | 0.6662  | 0.7174      | 0.04                      | 0.2286  | 0.3155      | 0.05                    | 0.1517  | 0.3458      |
|                                             | FPG                                     | 0.02               | 0.5239  | 0.5942      | 0.05                      | 0.1688  | 0.2433      | 0.07                    | 0.0313  | 0.2430      |
|                                             | DBP                                     | 0.05               | 0.2118  | 0.2965      | 0.06                      | 0.0829  | 0.1424      | 0.05                    | 0.1135  | 0.3036      |
|                                             | SBP                                     | 0.02               | 0.4917  | 0.5806      | 0.01                      | 0.6681  | 0.7375      | 0.02                    | 0.5339  | 0.7582      |
| <b>DNRA</b>                                 | Composite                               | 0.02               | 0.3618  | 0.4604      | 0.04                      | 0.0953  | 0.1557      | 0.04                    | 0.0869  | 0.2838      |
|                                             | Insulin                                 | 0.03               | 0.4523  | 0.5472      | 0.02                      | 0.4946  | 0.5771      | 0.01                    | 0.6827  | 0.8061      |
|                                             | HOMA-iR                                 | 0.03               | 0.4679  | 0.5591      | 0.03                      | 0.4227  | 0.5126      | 0.01                    | 0.6768  | 0.8061      |
|                                             | HbA1C                                   | 0.07               | 0.0478  | 0.0885      | 0.06                      | 0.0502  | 0.1093      | 0.07                    | 0.0480  | 0.2447      |
|                                             | FPG                                     | 0.01               | 0.7922  | 0.8439      | 0.04                      | 0.2472  | 0.3318      | 0.01                    | 0.7909  | 0.8762      |
|                                             | DBP                                     | 0.00               | 0.8990  | 0.9124      | 0.03                      | 0.4301  | 0.5140      | 0.04                    | 0.2014  | 0.4111      |

|                                             |           |       |        |        |       |        |        |       |        |        |
|---------------------------------------------|-----------|-------|--------|--------|-------|--------|--------|-------|--------|--------|
|                                             | SBP       | 0.00  | 0.9016 | 0.9124 | 0.04  | 0.2452 | 0.3318 | 0.05  | 0.1155 | 0.3036 |
| <b>ANR + DNRA</b>                           | Composite | 0.03  | 0.2689 | 0.3661 | 0.05  | 0.0208 | 0.0669 | 0.06  | 0.0042 | 0.0817 |
|                                             | Insulin   | 0.00  | 0.9031 | 0.9124 | 0.00  | 0.9658 | 0.9757 | 0.00  | 0.9878 | 0.9943 |
|                                             | HOMA-iR   | 0.00  | 0.9896 | 0.9896 | 0.01  | 0.7255 | 0.7900 | 0.01  | 0.7566 | 0.8621 |
|                                             | HbA1C     | 0.06  | 0.1046 | 0.1681 | 0.09  | 0.0040 | 0.0303 | 0.10  | 0.0022 | 0.0531 |
|                                             | FPG       | 0.03  | 0.4142 | 0.5195 | 0.07  | 0.0365 | 0.0990 | 0.07  | 0.0353 | 0.2430 |
|                                             | DBP       | 0.05  | 0.1523 | 0.2180 | 0.08  | 0.0218 | 0.0669 | 0.09  | 0.0087 | 0.1048 |
|                                             | SBP       | 0.02  | 0.5275 | 0.5942 | 0.05  | 0.1625 | 0.2376 | 0.06  | 0.0599 | 0.2447 |
| <b>Gene abundance product summary score</b> |           |       |        |        |       |        |        |       |        |        |
| <b>NO<sub>2</sub></b>                       | Composite | -0.06 | 0.0142 | 0.0340 | -0.03 | 0.2159 | 0.3023 | 0.01  | 0.6141 | 0.7993 |
|                                             | Insulin   | -0.09 | 0.0118 | 0.0321 | -0.07 | 0.0428 | 0.1023 | -0.02 | 0.5586 | 0.7603 |
|                                             | HOMA-iR   | -0.09 | 0.0162 | 0.0377 | -0.06 | 0.0772 | 0.1408 | -0.01 | 0.8047 | 0.8762 |
|                                             | HbA1C     | -0.06 | 0.1127 | 0.1782 | 0.01  | 0.8505 | 0.8682 | 0.02  | 0.5475 | 0.7586 |
|                                             | FPG       | -0.02 | 0.6548 | 0.7130 | 0.03  | 0.4053 | 0.5028 | 0.06  | 0.0554 | 0.2447 |
|                                             | DBP       | -0.03 | 0.3454 | 0.4454 | 0.00  | 0.9996 | 0.9996 | 0.03  | 0.3582 | 0.6100 |
|                                             | SBP       | -0.08 | 0.0334 | 0.0682 | -0.06 | 0.0630 | 0.1234 | -0.02 | 0.4990 | 0.7366 |
| <b>NO</b>                                   | Composite | -0.09 | 0.0004 | 0.0055 | -0.06 | 0.0113 | 0.0481 | -0.03 | 0.1943 | 0.4051 |
|                                             | Insulin   | -0.12 | 0.0009 | 0.0068 | -0.10 | 0.0057 | 0.0346 | -0.06 | 0.0869 | 0.2838 |
|                                             | HOMA-iR   | -0.12 | 0.0007 | 0.0067 | -0.10 | 0.0066 | 0.0346 | -0.05 | 0.1169 | 0.3036 |
|                                             | HbA1C     | -0.10 | 0.0072 | 0.0243 | -0.03 | 0.3140 | 0.3999 | -0.02 | 0.5109 | 0.7366 |
|                                             | FPG       | -0.07 | 0.0648 | 0.1114 | -0.03 | 0.3142 | 0.3999 | 0.01  | 0.8235 | 0.8869 |
|                                             | DBP       | -0.04 | 0.2381 | 0.3287 | -0.01 | 0.7472 | 0.7960 | 0.01  | 0.8428 | 0.8978 |
|                                             | SBP       | -0.07 | 0.0420 | 0.0791 | -0.06 | 0.0708 | 0.1335 | -0.03 | 0.3686 | 0.6123 |
| <b>NH<sub>3</sub></b>                       | Composite | 0.04  | 0.1470 | 0.2150 | 0.06  | 0.0089 | 0.0404 | 0.07  | 0.0010 | 0.0531 |
|                                             | Insulin   | 0.01  | 0.8067 | 0.8500 | 0.02  | 0.6663 | 0.7375 | 0.02  | 0.6490 | 0.8051 |
|                                             | HOMA-iR   | 0.02  | 0.6516 | 0.7130 | 0.03  | 0.4237 | 0.5126 | 0.03  | 0.3967 | 0.6479 |
|                                             | HbA1C     | 0.05  | 0.1323 | 0.1995 | 0.09  | 0.0038 | 0.0303 | 0.10  | 0.0021 | 0.0531 |
|                                             | FPG       | 0.05  | 0.1403 | 0.2083 | 0.09  | 0.0066 | 0.0346 | 0.09  | 0.0063 | 0.0885 |
|                                             | DBP       | 0.06  | 0.1238 | 0.1926 | 0.08  | 0.0214 | 0.0669 | 0.09  | 0.0055 | 0.0885 |

|                                         |           |       |        |        |       |        |        |       |        |        |
|-----------------------------------------|-----------|-------|--------|--------|-------|--------|--------|-------|--------|--------|
|                                         | SBP       | 0.02  | 0.5595 | 0.6230 | 0.04  | 0.2851 | 0.3776 | 0.05  | 0.1087 | 0.3036 |
| <b>Gene abundance pathway ratio</b>     |           |       |        |        |       |        |        |       |        |        |
| <b>RD vs ANR</b>                        | Composite | -0.09 | 0.0005 | 0.0065 | -0.07 | 0.0013 | 0.0303 | -0.04 | 0.0434 | 0.2430 |
|                                         | Insulin   | -0.07 | 0.0572 | 0.1000 | -0.06 | 0.0860 | 0.1443 | -0.01 | 0.7386 | 0.8617 |
|                                         | HOMA-iR   | -0.07 | 0.0399 | 0.0767 | -0.06 | 0.0675 | 0.1298 | -0.02 | 0.6199 | 0.7993 |
|                                         | HbA1C     | -0.07 | 0.0684 | 0.1136 | -0.06 | 0.0610 | 0.1220 | -0.05 | 0.1090 | 0.3036 |
|                                         | FPG       | -0.06 | 0.0733 | 0.1197 | -0.05 | 0.1463 | 0.2173 | -0.04 | 0.2408 | 0.4720 |
|                                         | DBP       | -0.10 | 0.0046 | 0.0189 | -0.08 | 0.0152 | 0.0571 | -0.04 | 0.1898 | 0.4043 |
|                                         | SBP       | -0.12 | 0.0007 | 0.0067 | -0.09 | 0.0043 | 0.0303 | -0.06 | 0.0594 | 0.2447 |
| <b>RD vs DNRA</b>                       | Composite | -0.06 | 0.0124 | 0.0328 | -0.05 | 0.0297 | 0.0855 | -0.02 | 0.2926 | 0.5233 |
|                                         | Insulin   | -0.08 | 0.0317 | 0.0660 | -0.06 | 0.0798 | 0.1408 | -0.02 | 0.5496 | 0.7586 |
|                                         | HOMA-iR   | -0.08 | 0.0353 | 0.0706 | -0.06 | 0.0869 | 0.1443 | -0.01 | 0.6624 | 0.8061 |
|                                         | HbA1C     | -0.10 | 0.0071 | 0.0243 | -0.05 | 0.1217 | 0.1893 | -0.05 | 0.1781 | 0.3878 |
|                                         | FPG       | -0.03 | 0.4461 | 0.5465 | -0.02 | 0.5925 | 0.6832 | 0.03  | 0.4468 | 0.6964 |
|                                         | DBP       | -0.04 | 0.3179 | 0.4154 | -0.03 | 0.4356 | 0.5143 | -0.01 | 0.6698 | 0.8061 |
|                                         | SBP       | -0.05 | 0.1290 | 0.1976 | -0.07 | 0.0384 | 0.0990 | -0.05 | 0.1290 | 0.3083 |
| <b>RD vs ANR + DNRA</b>                 | Composite | -0.09 | 0.0002 | 0.0047 | -0.07 | 0.0019 | 0.0303 | -0.04 | 0.0798 | 0.2838 |
|                                         | Insulin   | -0.09 | 0.0133 | 0.0336 | -0.07 | 0.0446 | 0.1023 | -0.02 | 0.6039 | 0.7993 |
|                                         | HOMA-iR   | -0.09 | 0.0117 | 0.0321 | -0.07 | 0.0437 | 0.1023 | -0.02 | 0.6366 | 0.8051 |
|                                         | HbA1C     | -0.12 | 0.0010 | 0.0070 | -0.07 | 0.0271 | 0.0804 | -0.06 | 0.0578 | 0.2447 |
|                                         | FPG       | -0.05 | 0.1535 | 0.2180 | -0.03 | 0.3523 | 0.4426 | 0.00  | 0.9409 | 0.9706 |
|                                         | DBP       | -0.08 | 0.0238 | 0.0531 | -0.06 | 0.0805 | 0.1408 | -0.04 | 0.2937 | 0.5233 |
|                                         | SBP       | -0.10 | 0.0038 | 0.0163 | -0.10 | 0.0032 | 0.0303 | -0.06 | 0.0409 | 0.2430 |
| <b>Gene abundance product ratio</b>     |           |       |        |        |       |        |        |       |        |        |
| <b>NO<sub>2</sub> vs NH<sub>3</sub></b> | Composite | -0.10 | 0.0001 | 0.0030 | -0.08 | 0.0007 | 0.0236 | -0.04 | 0.0392 | 0.2430 |
|                                         | Insulin   | -0.10 | 0.0067 | 0.0243 | -0.08 | 0.0215 | 0.0669 | -0.03 | 0.4481 | 0.6964 |
|                                         | HOMA-iR   | -0.10 | 0.0051 | 0.0202 | -0.08 | 0.0194 | 0.0669 | -0.03 | 0.4532 | 0.6964 |
|                                         | HbA1C     | -0.11 | 0.0031 | 0.0146 | -0.07 | 0.0377 | 0.0990 | -0.06 | 0.0749 | 0.2838 |
|                                         | FPG       | -0.07 | 0.0677 | 0.1136 | -0.04 | 0.1912 | 0.2716 | -0.01 | 0.7752 | 0.8732 |

|                                              |           |       |         |        |       |         |        |       |        |        |
|----------------------------------------------|-----------|-------|---------|--------|-------|---------|--------|-------|--------|--------|
|                                              | DBP       | -0.09 | 0.0117  | 0.0321 | -0.07 | 0.0454  | 0.1023 | -0.05 | 0.1682 | 0.3747 |
|                                              | SBP       | -0.11 | 0.0027  | 0.0145 | -0.10 | 0.0036  | 0.0303 | -0.06 | 0.0418 | 0.2430 |
| <b>NO vs NH<sub>3</sub></b>                  | Composite | -0.12 | <0.0001 | 0.0003 | -0.10 | <0.0001 | 0.0030 | -0.07 | 0.0013 | 0.0531 |
|                                              | Insulin   | -0.12 | 0.0007  | 0.0067 | -0.10 | 0.0037  | 0.0303 | -0.06 | 0.0772 | 0.2838 |
|                                              | HOMA-iR   | -0.13 | 0.0003  | 0.0053 | -0.11 | 0.0019  | 0.0303 | -0.06 | 0.0586 | 0.2447 |
|                                              | HbA1C     | -0.14 | 0.0001  | 0.0030 | -0.09 | 0.0038  | 0.0303 | -0.09 | 0.0096 | 0.1048 |
|                                              | FPG       | -0.11 | 0.0028  | 0.0145 | -0.09 | 0.0071  | 0.0346 | -0.05 | 0.1233 | 0.3036 |
|                                              | DBP       | -0.09 | 0.0142  | 0.0340 | -0.07 | 0.0581  | 0.1185 | -0.05 | 0.1226 | 0.3036 |
|                                              | SBP       | -0.10 | 0.0083  | 0.0261 | -0.08 | 0.0133  | 0.0523 | -0.05 | 0.0832 | 0.2838 |
| <b>NO + NO<sub>2</sub> vs NH<sub>3</sub></b> | Composite | -0.11 | <0.0001 | 0.0010 | -0.09 | 0.0002  | 0.0088 | -0.05 | 0.0121 | 0.1182 |
|                                              | Insulin   | -0.11 | 0.0022  | 0.0128 | -0.09 | 0.0091  | 0.0404 | -0.04 | 0.2506 | 0.4816 |
|                                              | HOMA-iR   | -0.11 | 0.0015  | 0.0097 | -0.10 | 0.0071  | 0.0346 | -0.04 | 0.2387 | 0.4720 |
|                                              | HbA1C     | -0.12 | 0.0009  | 0.0068 | -0.08 | 0.0162  | 0.0590 | -0.07 | 0.0360 | 0.2430 |
|                                              | FPG       | -0.08 | 0.0275  | 0.0591 | -0.06 | 0.0779  | 0.1408 | -0.02 | 0.4930 | 0.7366 |
|                                              | DBP       | -0.09 | 0.0114  | 0.0321 | -0.07 | 0.0459  | 0.1023 | -0.05 | 0.1493 | 0.3458 |
|                                              | SBP       | -0.11 | 0.0031  | 0.0146 | -0.10 | 0.0042  | 0.0303 | -0.06 | 0.0446 | 0.2430 |
| <b>NO<sub>2</sub> vs NO + NH<sub>3</sub></b> | Composite | -0.08 | 0.0016  | 0.0100 | -0.06 | 0.0129  | 0.0523 | -0.02 | 0.3610 | 0.6100 |
|                                              | Insulin   | -0.07 | 0.0542  | 0.0965 | -0.06 | 0.1199  | 0.1893 | 0.01  | 0.8611 | 0.9074 |
|                                              | HOMA-iR   | -0.07 | 0.0498  | 0.0905 | -0.05 | 0.1319  | 0.2020 | 0.01  | 0.8004 | 0.8762 |
|                                              | HbA1C     | -0.08 | 0.0211  | 0.0480 | -0.05 | 0.1463  | 0.2173 | -0.04 | 0.2797 | 0.5172 |
|                                              | FPG       | -0.04 | 0.2751  | 0.3693 | -0.01 | 0.7380  | 0.7948 | 0.02  | 0.5891 | 0.7909 |
|                                              | DBP       | -0.09 | 0.0134  | 0.0336 | -0.07 | 0.0577  | 0.1185 | -0.04 | 0.2772 | 0.5172 |
|                                              | SBP       | -0.11 | 0.0033  | 0.0148 | -0.09 | 0.0066  | 0.0346 | -0.05 | 0.0912 | 0.2883 |

Abbreviations: **NO<sub>3</sub>**, nitrate; **NO<sub>2</sub>**, nitrite; **NO**, nitric oxide; **NH<sub>3</sub>**, ammonia; **RD**, respiratory denitrification; **DNRA**, dissimilatory nitrate reduction to ammonia; **ANR**, assimilatory nitrate reduction; **CMZ**: composite cardiometabolic score which averages the Z-scores for the individual cardiometabolic risk variables; **HOMA-IR**: homeostatic model assessment of insulin resistance, **HbA1c**: haemoglobin A1c; **FPG**: fasting plasma glucose; **DBP**: diastolic blood pressure; **SBP**: systolic blood pressure; **FDR**: false discovery rate.

Simple adjusted multivariable models controlling for sex, age, race/ethnicity.

Fully adjusted multivariable models controlling for sex, age, race/ethnicity, education, smoking status, body mass index and periodontal disease

Summary scores were arcsine square root transformed and ratios of nitrite generation-to-depletion underwent natural log-transformation before use in linear regression analyses. Results are presented as the change in the dependent variable for a 1 standard deviation change in the independent variable.

**Figure S1.**

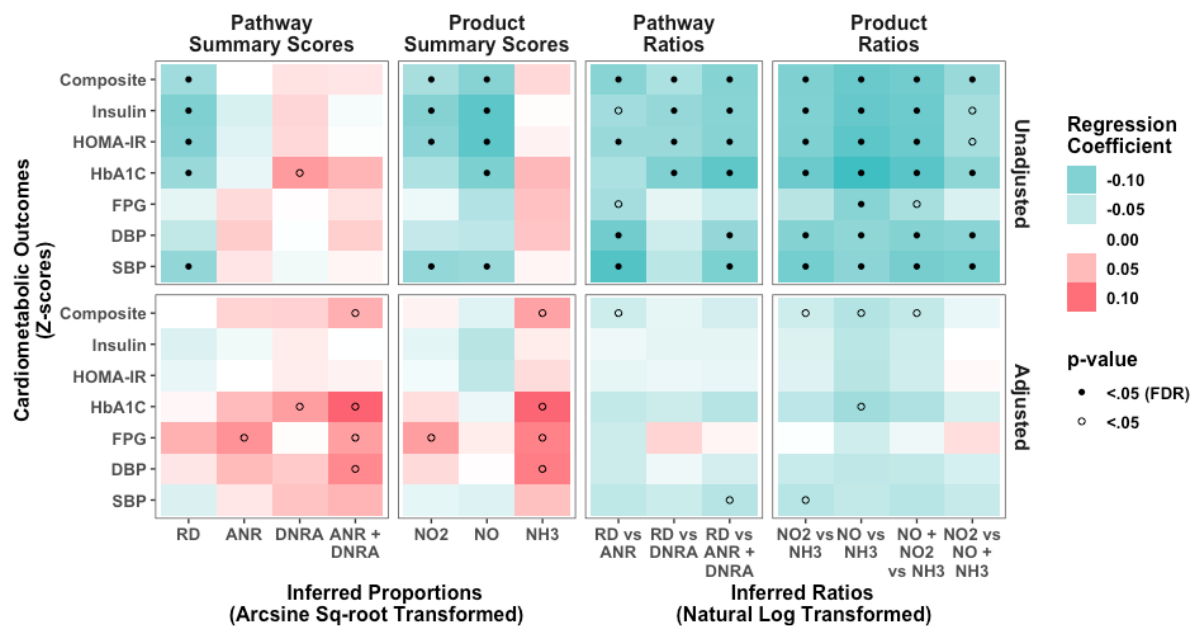

**Association between select measures of nitrogen metabolism and cardiometabolic risk Z-scores, unadjusted and fully adjusted for sex, age, race/ethnicity, education, smoking status, body mass index, and periodontal disease. Results from the within-mouth average of predicted gene abundances across samples from shallow and deep sites in n=772 participants in the Oral Infections, Glucose Intolerance and Insulin Resistance Study (ORIGINS).**

This heatmap represents the beta coefficients (change in cardiometabolic risk Z-score per 1 SD increase in metagenomic variable) from i) unadjusted (upper panels) and ii) fully adjusted multivariable linear regression models (lower panels) regressing cardiometabolic Z-scores on the following measures of nitrogen metabolism. 2A) Abundance of microbial genes in the following 3 pathways were considered: respiratory denitrification (RD); dissimilatory nitrate reduction to ammonia (DNRA); and assimilatory nitrate reduction (ANR); 2B) Abundance of microbial genes for reductase enzymes that produce the following biochemical products: ( $\text{NO}_2$ ,  $\text{NO}$ , and  $\text{NH}_3$ ); 2C) Nitrite generation-vs-depletion ratios of microbial gene abundances for pathways (RD vs. ANR, RD vs. DNRA, RD vs. ANR+DNRA) or products ( $\text{NO}_2$  vs.  $\text{NH}_3$ ,  $\text{NO}$  vs.  $\text{NH}_3$ ,  $\text{NO}+\text{NO}_2$  vs.  $\text{NH}_3$ ,  $\text{NO}_2$  vs.  $\text{NO} + \text{NH}_3$ ). Green represents inverse associations, and red represents positive associations. Darker colors represent a larger effect estimate.

Within-mouth average gene abundances were obtained from both shallow and deep sites by weighting samples by the percentage of shallow (< 4mm) vs. deep ( $\geq$  4mm) probing depths in the mouth, respectively. Participants with only shallow or disease sample were assigned a weight of 100% for that sample. Three participants were missing percentage of probing depths measurements and excluded from the analyses.

Abbreviations:  $\text{NO}_3$ , nitrate;  $\text{NO}_2$ , nitrite;  $\text{NO}$ , nitric oxide;  $\text{NH}_3$ , ammonia; **RD**, respiratory denitrification; **DNRA**, dissimilatory nitrate reduction to ammonia; **ANR**, assimilatory nitrate reduction; **CMZ**: composite cardiometabolic score which averages the Z-scores for the

individual cardiometabolic risk variables; **HOMA-IR**: homeostatic model assessment of insulin resistance, **HbA1c**: haemoglobin A1c; **FPG**: fasting plasma glucose; **DBP**: diastolic blood pressure; **SBP**: systolic blood pressure; **FDR**: false discovery rate.



Figure S2.

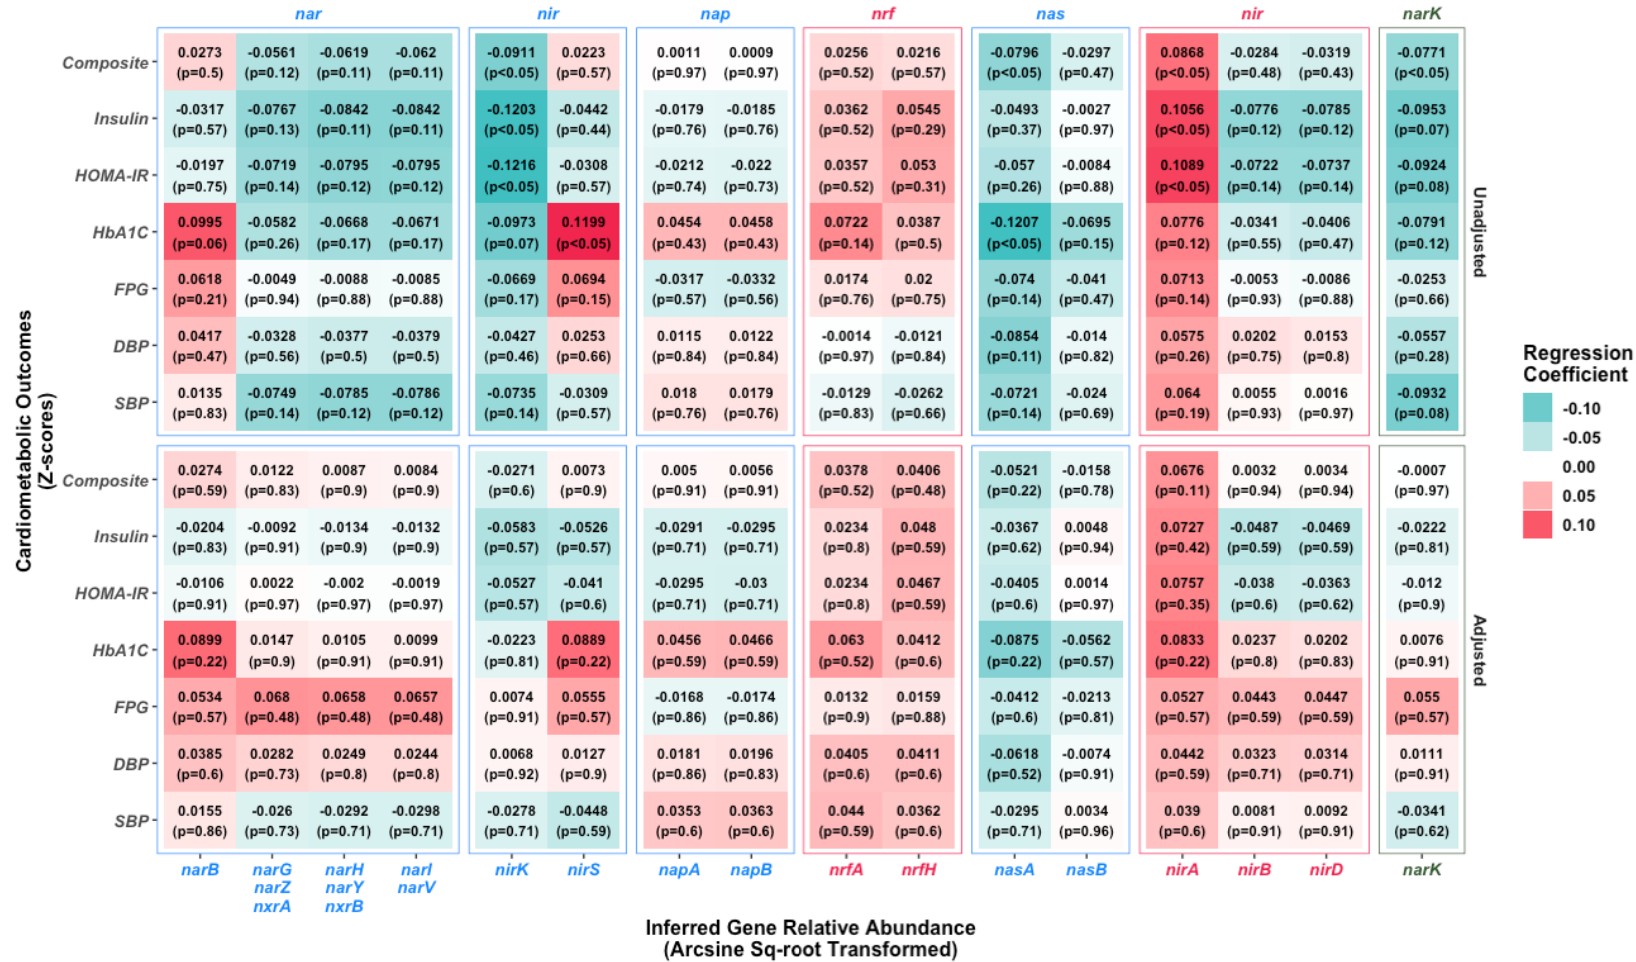

Exploratory analyses of the 16 individual natural-log transformed predicted relative gene abundances and cardiometabolic risk Z-scores, unadjusted (N=764) and fully adjusted for sex, age, race/ethnicity, education smoking status, body mass index, and periodontal disease (N= 705)

Note: Regression coefficients are scaled to present the change in the dependent variable for a 1 standard deviation change in the independent variable.

Abbreviations: CMZ: composite cardiometabolic score which averages the Z-scores for the individual cardiometabolic risk variables; HOMA-IR: homeostatic model assessment of insulin resistance, HbA1c: haemoglobin A1c; FPG: fasting plasma glucose; DBP: diastolic blood pressure; SBP: systolic blood pressure

Figure S3.

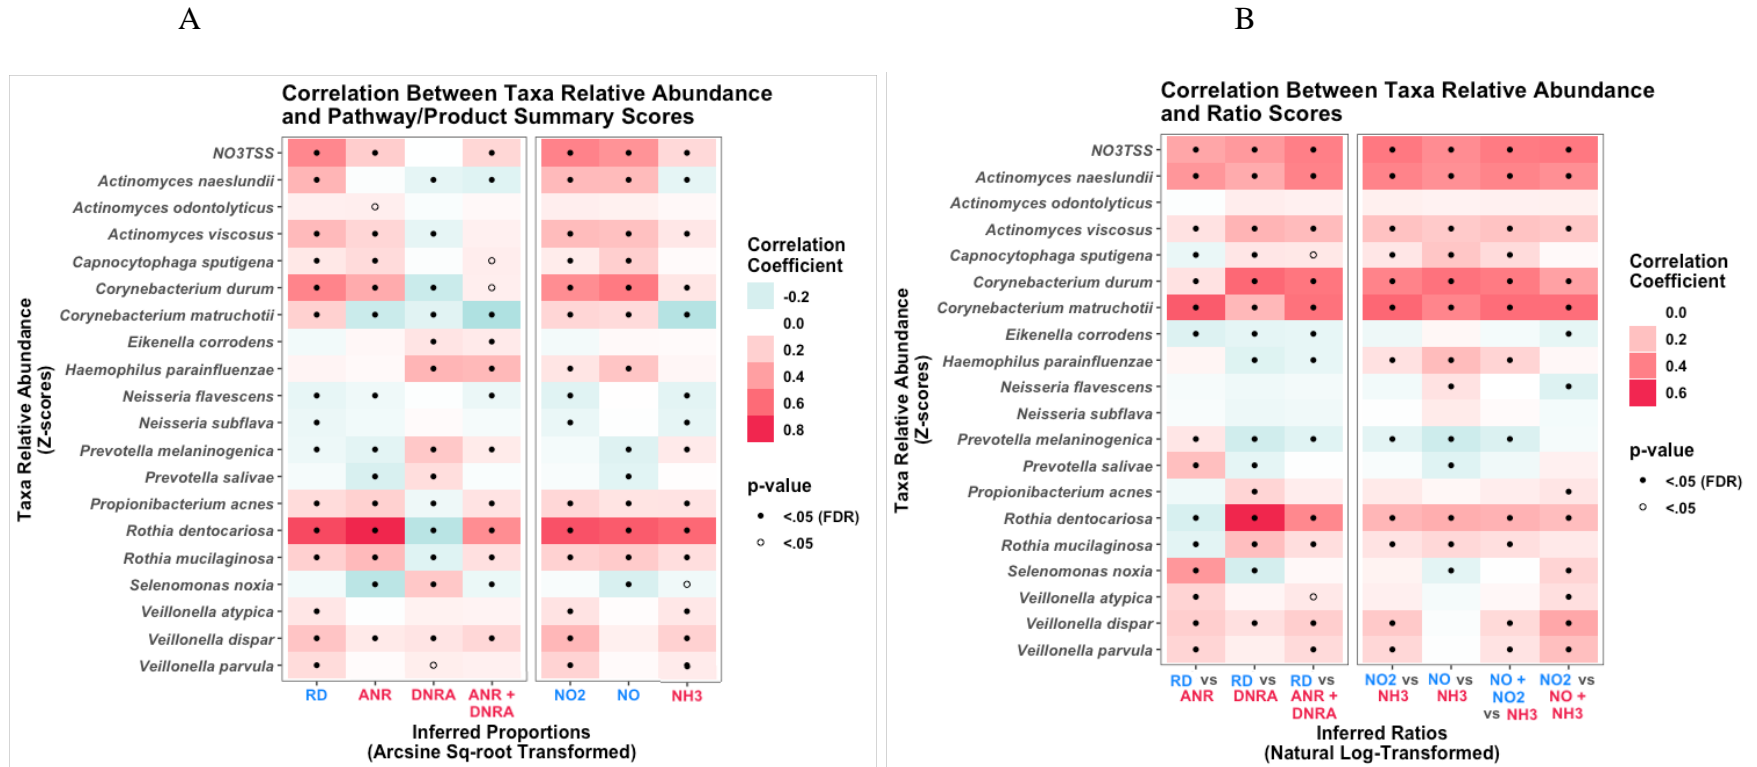

C

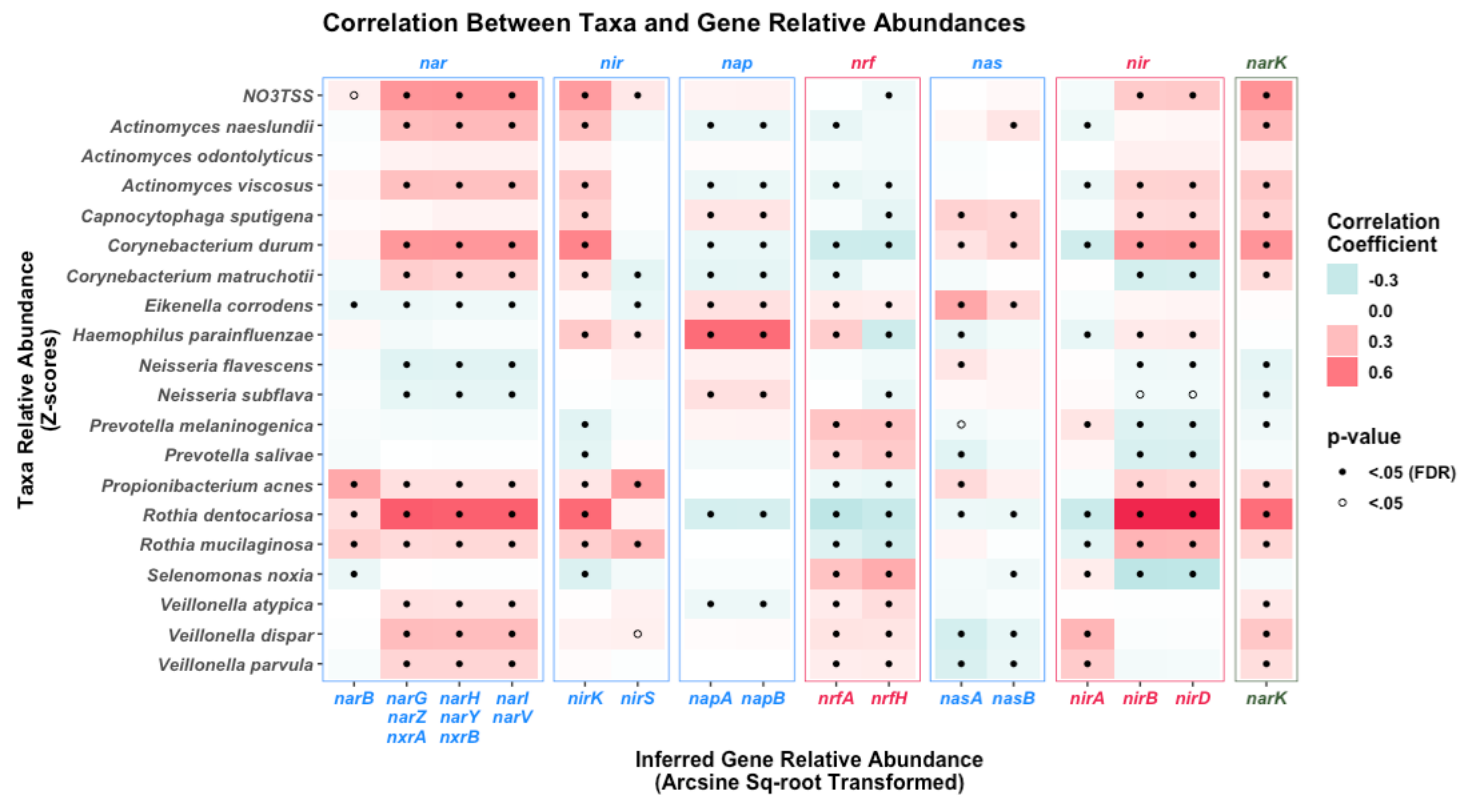

Correlation matrices of the nitrate-reducing taxa summary score (NO<sub>3</sub>TSS) and individual *a priori* taxa, with the A) gene abundance pathway and biochemical product summary scores, B) nitrite generation-to-depletion gene abundance ratios, and C) individual relative gene abundances

Note: *Neisseria sicca* was not present in this dataset.

Abbreviations: **NO<sub>3</sub>TSS**, nitrate-reducing taxa summary score; **NO<sub>3</sub>**, nitrate; **NO<sub>2</sub>**, nitrite; **NO**, nitric oxide; **NH<sub>3</sub>**, ammonia; **RD**, respiratory denitrification; **DNRA**, dissimilatory nitrate reduction to ammonia; **ANR**, assimilatory nitrate reduction; **FDR**: false discovery rate.
